# Supplementary material for: Joint Effect of Carotid Plaque and C‐Reactive Protein on First‐Ever Ischemic Stroke and Myocardial Infarction?
Source: PubMed Central journal article supplement — J Am Heart Assoc. 2018 May 17;7(11):e008951. doi: 10.1161/JAHA.118.008951 (PMC6015371; doi:10.1161/jaha.118.008951), 2018-05-17
Supplement: JAH3-7-e008951-s001.pdf [file JAH3-7-e008951-s001.pdf]

# **Supplemental Material**

**Table S1. Distribution of risk factors in the different surveys stratified by sex. The Tromsø Study.**

|                                            | Women<br>(n = 5704)                   |                                       |                                       | Men<br>(n = 4405)                     |                                       |                                       |
|--------------------------------------------|---------------------------------------|---------------------------------------|---------------------------------------|---------------------------------------|---------------------------------------|---------------------------------------|
|                                            | 4 <sup>th</sup> survey<br>(1994-1995) | 5 <sup>th</sup> survey<br>(2001-2002) | 6 <sup>th</sup> survey<br>(2007-2008) | 4 <sup>th</sup> survey<br>(1994-1995) | 5 <sup>th</sup> survey<br>(2001-2002) | 6 <sup>th</sup> survey<br>(2007-2008) |
| Number of observations                     | 3194                                  | 2948                                  | 3902                                  | 2922                                  | 2168                                  | 2824                                  |
| Age (years), mean (SD)                     | 60.3 (10.4)                           | 65.4 (9.8)                            | 63.6 (9.3)                            | 59.1 (10.2)                           | 65.5 (9.4)                            | 63.5 (9.1)                            |
| BMI (kg/m <sup>2</sup> ), mean (SD)        | 25.9 (4.5)                            | 26.8 (4.6)                            | 26.8 (4.6)                            | 26.0 (3.3)                            | 26.7 (3.4)                            | 27.3 (3.7)                            |
| Carotid plaque, %                          | 44.0                                  | 53.0                                  | 41.2                                  | 51.0                                  | 65.5                                  | 50.0                                  |
| TPA (mm <sup>2</sup> ), median (IQR)*      | 13.2<br>(7.7, 22.5)                   | 15.7<br>(8.7, 39.7)                   | 16.6<br>(10.0, 27.4)                  | 17.1<br>(9.8, 29.8)                   | 20.3<br>(11.3, 35.8)                  | 21.9<br>(12.9, 36.6)                  |
| CRP (mg/L), median (IQR)                   | 1.13<br>(0.56, 2.41)                  | 1.53<br>(0.80, 3.14)                  | 1.36<br>(0.71, 2.70)                  | 1.27<br>(0.66, 2.67)                  | 1.59<br>(0.86, 3.12)                  | 1.37<br>(0.77, 2.55)                  |
| Systolic blood pressure (mmHg), mean (SD)  | 145 (24)                              | 145 (23)                              | 140 (25)                              | 145 (20)                              | 144 (20)                              | 142 (20)                              |
| Diastolic blood pressure (mmHg), mean (SD) | 82 (13)                               | 81 (13)                               | 76 (10)                               | 85 (12)                               | 83 (12)                               | 82 (10)                               |
| Hypertension (SD), %                       | 54.9                                  | 59.9                                  | 56.9                                  | 57.9                                  | 61.6                                  | 60.6                                  |
| Antihypertensive medication, %             | 12.2                                  | 23.5                                  | 28.9                                  | 11.0                                  | 23.3                                  | 26.2                                  |
| Total cholesterol (mmol/L), mean (SD)      | 6.9 (1.3)                             | 6.5 (1.2)                             | 5.9 (1.1)                             | 6.5 (1.2)                             | 6.1 (1.1)                             | 5.6 (1.1)                             |
| HDL cholesterol (mmol/L), mean (SD)        | 1.7 (0.4)                             | 1.6 (0.4)                             | 1.7 (0.4)                             | 1.4 (0.4)                             | 1.4 (0.4)                             | 1.4 (0.4)                             |
| Lipid-lowering medication, %               | 1.8                                   | 10.9                                  | 16.0                                  | 1.5                                   | 14.9                                  | 17.4                                  |
| Diabetes mellitus, %                       | 3.8                                   | 7.3                                   | 7.2                                   | 3.6                                   | 9.8                                   | 8.2                                   |
| Smoking, %                                 | 31.1                                  | 24.7                                  | 18.7                                  | 35.4                                  | 25.3                                  | 16.6                                  |

BMI, body mass index; TPA, total plaque area; CRP, C-reactive protein; HDL, high-density lipoprotein; *n*, number of participants; IQR, interquartile range; SD, standard deviation. \*If prevalent carotid plaque. In total 10 109 participants were included in the study, of these 4932 attended one, 2505 attended two and 2672 attended three surveys.

**Table S2. Sex stratified incidence rates (IRs) and hazard ratios (HRs) with 95% confidence intervals (CIs) of first-ever ischemic stroke from time-varying Cox models across risk categories of C-reactive protein (CRP). The Tromsø Study.**

| CRP          | <i>n</i> <sup>*</sup> | Events | IR <sup>†</sup><br>(95% CI) | Model 1 <sup>‡</sup><br>HR (95% CI) | Model 2 <sup>§</sup><br>HR (95% CI) |
|--------------|-----------------------|--------|-----------------------------|-------------------------------------|-------------------------------------|
| <b>Men</b>   |                       |        |                             |                                     |                                     |
| < 1 mg /L    | 2820                  | 83     | 4.5 (3.7, 5.6)              | Reference                           | Reference                           |
| 1–3 mg/L     | 3209                  | 130    | 6.3 (5.3, 7.5)              | 1.19 (0.90, 1.57)                   | 1.06 (0.80, 1.41)                   |
| > 3 mg/L     | 1743                  | 132    | 12.5 (10.5, 14.8)           | 2.24 (1.70, 2.95)                   | 1.84 (1.39, 2.45)                   |
| <b>Women</b> |                       |        |                             |                                     |                                     |
| < 1 mg /L    | 3870                  | 78     | 3.1 (2.5, 3.8)              | Reference                           | Reference                           |
| 1–3 mg/L     | 3815                  | 131    | 5.2 (4.3, 6.1)              | 1.36 (1.02, 1.80)                   | 1.23 (0.92, 1.64)                   |
| > 3 mg/L     | 2211                  | 117    | 8.1 (6.8, 9.7)              | 2.14 (1.61, 2.86)                   | 1.79 (1.32, 2.43)                   |

\*Observations. †Crude IRs per 1000 person-years. ‡ Age as time-scale. §Age as time-scale, adjusted for total cholesterol, high-density lipoprotein cholesterol, diabetes mellitus, systolic blood pressure, smoking, body mass index, lipid-lowering medication and antihypertensive medication.

**Table S3. Sex stratified incidence rates (IRs) and hazard ratios (HRs) with 95% confidence intervals (CIs) of first-ever myocardial infarction from time-varying Cox models across risk categories of C-reactive protein (CRP). The Tromsø Study.**

| CRP          | <i>n</i> * | Events | IR <sup>†</sup><br>(95% CI) | Model 1 <sup>‡</sup><br>HR (95% CI) | Model 2 <sup>§</sup><br>HR (95% CI) |
|--------------|------------|--------|-----------------------------|-------------------------------------|-------------------------------------|
| <b>Men</b>   |            |        |                             |                                     |                                     |
| < 1 mg /L    | 2758       | 149    | 8.4 (7.1, 9.8)              | Reference                           | Reference                           |
| 1–3 mg/L     | 3156       | 282    | 14.1 (12.5, 15.8)           | 1.52 (1.25, 1.86)                   | 1.31(1.07, 1.61)                    |
| > 3 mg/L     | 1708       | 202    | 19.6 (17.1, 22.5)           | 2.03 (1.64, 2.51)                   | 1.56 (1.25, 1.94)                   |
| <b>Women</b> |            |        |                             |                                     |                                     |
| < 1 mg /L    | 3847       | 113    | 4.5 (3.7, 5.4)              | Reference                           | Reference                           |
| 1–3 mg/L     | 3782       | 185    | 7.4 (6.4, 8.5)              | 1.35 (1.07, 1.70)                   | 1.14 (0.90, 1.46)                   |
| > 3 mg/L     | 2203       | 148    | 10.3 (8.7, 12.1)            | 1.83 (1.43, 2.33)                   | 1.36 (1.04, 1.76)                   |

\*Observations. <sup>†</sup>Crude IRs per 1000 person-years. <sup>‡</sup> Age as time-scale. <sup>§</sup> Age as time-scale, adjusted for total cholesterol, high-density lipoprotein cholesterol, diabetes mellitus, systolic blood pressure, smoking, body mass index, lipid-lowering medication and antihypertensive medication.

**Table S4. Sex stratified incidence rates (IRs) and hazard ratios (HRs) with 95% confidence intervals (CIs) of first-ever ischemic stroke from time-varying Cox models across categories of total plaque area (TPA) before and after adjustment for C-reactive protein (CRP). The Tromsø Study.**

| TPA          | <i>n</i> <sup>*</sup> | Events | IR <sup>†</sup> (95% CI) | Model 1 <sup>‡</sup><br>HR (95% CI) | Model 1 <sup>‡</sup> + CRP<br>HR (95% CI) | Absolute attenuation of HR<br>after inclusion of CRP in the<br>model <sup>§</sup> | Percentage attenuation of HR<br>after inclusion of CRP in the<br>model | Model 2 <sup>  </sup> HR<br>(95% CI) |
|--------------|-----------------------|--------|--------------------------|-------------------------------------|-------------------------------------------|-----------------------------------------------------------------------------------|------------------------------------------------------------------------|--------------------------------------|
| <b>Men</b>   |                       |        |                          |                                     |                                           |                                                                                   |                                                                        |                                      |
| No plaque    | 3543                  | 89     | 3.9 (3.2, 4.8)           | Reference                           | Reference                                 | –                                                                                 | –                                                                      | Reference                            |
| TPA<median   | 2115                  | 93     | 6.9 (5.6, 8.4)           | 1.27 (0.94, 1.70)                   | 1.25 (0.93, 1.68)                         | 0.02                                                                              | 7.4                                                                    | 1.16 (0.87, 1.56)                    |
| TPA>median   | 2114                  | 163    | 12.4 (10.7, 14.5)        | 1.81 (1.38, 2.37)                   | 1.72 (1.31, 2.24)                         | 0.09                                                                              | 11.1                                                                   | 1.45 (1.11, 1.91)                    |
| <b>Women</b> |                       |        |                          |                                     |                                           |                                                                                   |                                                                        |                                      |
| No plaque    | 5402                  | 88     | 2.5 (2.0, 3.1)           | Reference                           | Reference                                 | –                                                                                 | –                                                                      | Reference                            |
| TPA<median   | 2247                  | 84     | 5.6 (4.5, 6.9)           | 1.46 (1.08, 1.98)                   | 1.46 (1.07, 1.97)                         | 0.00                                                                              | –                                                                      | 1.41 (1.04, 1.91)                    |
| TPA>median   | 2247                  | 154    | 10.2 (8.7, 11.9)         | 2.03 (1.54, 2.67)                   | 1.96 (1.49, 2.58)                         | 0.07                                                                              | 6.8                                                                    | 1.72 (1.30, 2.28)                    |

\*Observations. †Crude IRs per 1000 person-years. ‡ Age as time-scale. § Change in HR from Model 1 to Model 1 + CRP. CRP was log-transformed. || Age as time-scale, adjusted for total cholesterol, high-density lipoprotein cholesterol, diabetes mellitus, systolic blood pressure, smoking, body mass index, lipid -lowering medication, antihypertensive medication and CRP (log-transformed).

**Table S5. Sex stratified incidence rates (IRs) and hazard ratios (HRs) with 95% confidence intervals (CIs) of first-ever myocardial infarction from time-varying Cox models across categories of total plaque area (TPA) before and after adjustment for C-reactive protein (CRP). The Tromsø Study.**

| TPA          | <i>n</i> <sup>*</sup> | Events | IR <sup>†</sup> (95% CI) | Model 1 <sup>‡</sup><br>HR (95% CI) | Model 1 <sup>‡</sup> + CRP<br>HR (95% CI) | Absolute attenuation of<br>HR after inclusion of CRP<br>in the model <sup>§</sup> | Percentage attenuation of HR<br>after inclusion of CRP in the<br>model | Model 2 <sup>  </sup> HR<br>(95% CI) |
|--------------|-----------------------|--------|--------------------------|-------------------------------------|-------------------------------------------|-----------------------------------------------------------------------------------|------------------------------------------------------------------------|--------------------------------------|
| <b>Men</b>   |                       |        |                          |                                     |                                           |                                                                                   |                                                                        |                                      |
| No plaque    | 3493                  | 178    | 8.0 (6.9, 9.2)           | Reference                           | Reference                                 | –                                                                                 | –                                                                      | Reference                            |
| TPA<median   | 2043                  | 173    | 13.2 (11.4, 15.3)        | 1.36 (1.10, 1.68)                   | 1.35 (1.09, 1.67)                         | 0.01                                                                              | 2.7                                                                    | 1.22 (0.98, 1.51)                    |
| TPA>median   | 2065                  | 282    | 22.2 (19.7, 24.9)        | 1.99 (1.63, 2.43)                   | 1.91 (1.56, 2.32)                         | 0.08                                                                              | 8.1                                                                    | 1.57 (1.29, 1.93)                    |
| <b>Women</b> |                       |        |                          |                                     |                                           |                                                                                   |                                                                        |                                      |
| No plaque    | 5388                  | 122    | 3.5 (2.9, 4.2)           | Reference                           | Reference                                 | –                                                                                 | –                                                                      | Reference                            |
| TPA<median   | 2221                  | 118    | 7.9 (6.6, 9.2)           | 1.61 (1.25, 2.08)                   | 1.60 (1.24, 2.07)                         | 0.01                                                                              | 1.6                                                                    | 1.46 (1.13, 1.89)                    |
| TPA>median   | 2223                  | 206    | 13.9 (12.1, 15.9)        | 2.34 (1.85, 2.95)                   | 2.28 (1.81, 2.88)                         | 0.06                                                                              | 4.5                                                                    | 1.75 (1.38, 2.23)                    |

<sup>\*</sup>Observations. <sup>†</sup>Crude IRs per 1000 person-years. <sup>‡</sup> Age as time-scale. <sup>§</sup> Change in HR from Model 1 to Model 1 + CRP. CRP was log-transformed. <sup>||</sup> Age as time-scale, adjusted for total cholesterol, high-density lipoprotein cholesterol, diabetes mellitus, systolic blood pressure, smoking, body mass index, lipid-lowering medication, antihypertensive medication and CRP (log-transformed).

**Table S6. Incidence rates (IRs) and hazard ratios (HRs) with 95% confidence intervals (CIs) of first-ever ischemic stroke (IS) and myocardial infarction (MI) from time-varying Cox models across constellations of C-reactive protein (CRP) and categories of total plaque area (TPA). The Tromsø Study.**

|                               | Ischemic stroke |             |                          |                          | Myocardial infarction |             |                          |                          |
|-------------------------------|-----------------|-------------|--------------------------|--------------------------|-----------------------|-------------|--------------------------|--------------------------|
|                               | n*              | Incident IS | IR <sup>†</sup> (95% CI) | HR <sup>‡</sup> (95% CI) | n*                    | Incident MI | IR <sup>†</sup> (95% CI) | HR <sup>‡</sup> (95% CI) |
| <b>Both sexes<sup>§</sup></b> |                 |             |                          |                          |                       |             |                          |                          |
| No plaque & CRP <1 mg/L       | 3784            | 51          | 2.1 (1.6, 2.7)           | Ref.                     | 3762                  | 72          | 2.9 (2.3, 3.7)           | Ref.                     |
| No plaque & CRP 1-3mg/L       | 3436            | 71          | 3.2 (2.5, 4.0)           | 1.25 (0.87, 1.79)        | 3409                  | 140         | 6.4 (5.4, 7.5)           | 1.86 (1.40, 2.48)        |
| No plaque & CRP >3 mg/L       | 1725            | 55          | 5.0 (3.8, 6.5)           | 1.93 (1.32, 2.82)        | 1710                  | 88          | 8.0 (6.5, 9.9)           | 2.36 (1.73, 3.22)        |
| TPA<median & CRP <1 mg/L      | 1608            | 41          | 3.9 (2.9, 5.3)           | 1.22 (0.81, 1.84)        | 1581                  | 82          | 8.0 (6.5, 10.0)          | 1.96 (1.43, 2.69)        |
| TPA<median & CRP 1-3 mg/L     | 1756            | 79          | 6.8 (5.4, 8.4)           | 1.86 (1.30, 2.65)        | 1724                  | 108         | 9.4 (7.8, 11.4)          | 2.10 (1.55, 2.83)        |
| TPA<median & CRP >3 mg/L      | 997             | 57          | 9.0 (6.9, 11.6)          | 2.50 (1.70, 3.65)        | 980                   | 101         | 16.3 (13.4, 18.8)        | 3.72 (2.74, 5.05)        |
| TPA>median & CRP <1 mg/L      | 1298            | 69          | 8.0 (6.3, 10.1)          | 1.85 (1.28, 2.68)        | 1262                  | 108         | 13.0 (10.7, 15.7)        | 2.67 (1.97, 3.62)        |
| TPA>median & CRP 1-3 mg/L     | 1832            | 111         | 9.2 (7.7, 11.1)          | 2.04 (1.45, 2.86)        | 1805                  | 219         | 18.8 (16.5, 21.5)        | 3.71 (2.83, 4.88)        |
| TPA>median & CRP >3 mg/L      | 1232            | 137         | 18.2 (15.4, 21.5)        | 4.07 (2.93, 5.66)        | 1219                  | 161         | 21.2 (18.2, 24.8)        | 4.17 (3.14, 5.54)        |
| <b>Men</b>                    |                 |             |                          |                          |                       |             |                          |                          |
| No plaque & CRP <1 mg/L       | 1441            | 26          | 2.8 (1.9, 4.0)           | Ref.                     | 1422                  | 37          | 4.0 (1.7, 3.2)           | Ref.                     |
| No plaque & CRP 1-3mg/L       | 1444            | 34          | 3.7(2.6, 5.1)            | 1.10 (0.66, 1.84)        | 1424                  | 87          | 9.6 (7.8, 11.9)          | 2.20 (1.49, 3.23)        |
| No plaque & CRP >3 mg/L       | 658             | 29          | 7.0 (4.9, 10.1)          | 2.08 (1.22, 3.53)        | 647                   | 54          | 13.5 (10.3, 17.6)        | 3.01 (1.98, 4.57)        |
| TPA<median & CRP <1 mg/L      | 778             | 24          | 4.8 (3.2, 7.1)           | 1.19 (0.68, 2.08)        | 760                   | 53          | 10.9 (8.3, 14.2)         | 2.20 (1.44, 3.36)        |
| TPA<median & CRP 1-3 mg/L     | 873             | 41          | 7.3 (5.4, 9.9)           | 1.64 (1.00, 2.69)        | 854                   | 65          | 11.8 (9.3, 15.1)         | 2.27 (1.51, 3.42)        |
| TPA<median & CRP >3 mg/L      | 463             | 28          | 9.8 (6.8, 14.2)          | 2.14 (1.25, 3.66)        | 450                   | 55          | 20.3 (15.6, 26.4)        | 3.85 (2.53, 5.87)        |
| TPA>median & CRP <1 mg/L      | 601             | 33          | 8.6 (6.1, 12.2)          | 1.62 (0.96, 2.73)        | 576                   | 59          | 16.3 (12.6, 21.0)        | 2.82 (1.86, 4.28)        |
| TPA>median & CRP 1-3 mg/L     | 892             | 55          | 9.7 (7.4, 12.6)          | 1.78 (1.11, 2.86)        | 878                   | 130         | 23.6 19.9, 28.1)         | 4.06 (2.80, 5.90)        |
| TPA>median & CRP >3 mg/L      | 622             | 75          | 20.9 (16.7, 26.2)        | 3.81 (2.42, 6.01)        | 611                   | 93          | 25.9 (21.2, 31.8)        | 4.39 (2.98, 6.48)        |
| <b>Women</b>                  |                 |             |                          |                          |                       |             |                          |                          |
| No plaque & CRP <1 mg/L       | 2343            | 25          | 1.7 (1.1, 2.4)           | Ref.                     | 2340                  | 35          | 2.3 (1.7, 3.2)           | Ref.                     |
| No plaque & CRP 1-3mg/L       | 1992            | 37          | 2.8 (2.1, 3.9)           | 1.42 (0.86, 2.37)        | 1985                  | 53          | 4.1 (3.1, 5.3)           | 1.44 (0.94, 2.21)        |
| No plaque & CRP >3 mg/L       | 1067            | 26          | 3.7 (2.5, 5.5)           | 1.81 (1.04, 3.14)        | 1063                  | 34          | 4.9 (3.5, 6.9)           | 1.66 (1.04, 2.67)        |
| TPA<median & CRP <1 mg/L      | 830             | 17          | 3.1 (1.9, 5.0)           | 1.21 (0.65, 2.25)        | 821                   | 29          | 5.5 (3.9, 7.9)           | 1.59 (0.98, 2.60)        |
| TPA<median & CRP 1-3 mg/L     | 883             | 38          | 6.3 (4.6, 8.7)           | 2.06 (1.24, 3.51)        | 870                   | 43          | 7.2 (5.4, 9.7)           | 1.85 (1.18, 2.89)        |
| TPA<median & CRP >3 mg/L      | 534             | 29          | 8.2 (5.7, 11.8)          | 2.92 (1.70, 5.01)        | 530                   | 46          | 13.2 (9.9, 17.7)         | 3.41 (2.19, 5.31)        |
| TPA>median & CRP <1 mg/L      | 697             | 36          | 7.5 (5.4, 10.3)          | 2.09 (1.24, 3.51)        | 686                   | 49          | 10.4 (7.9, 13.8)         | 2.41 (1.55, 3.74)        |
| TPA>median & CRP 1-3 mg/L     | 940             | 56          | 8.9 (6.8, 11.5)          | 2.31 (1.43, 3.76)        | 927                   | 89          | 14.5 (11.8, 17.9)        | 3.17 (2.13, 4.73)        |
| TPA>median & CRP >3 mg/L      | 610             | 62          | 15.7 (12.3, 20.2)        | 4.28 (2.66, 6.89)        | 610                   | 68          | 17.0 (13.4, 21.6)        | 3.80 (2.51, 5.76)        |

---

\* Observations

† Crude incidence rates per 1000 person-years.

‡ Adjusted for age (¶and sex).

---



**Table S7. Additive interaction of C-reactive protein (CRP) and categories of total plaque area (TPA) on risk of first-ever ischemic stroke and myocardial infarction. The Tromsø Study.**

|                                                | <b>Ischemic stroke</b>   | <b>Myocardial infarction</b> |
|------------------------------------------------|--------------------------|------------------------------|
| <i>Exposure</i>                                | <i>HR* (95% CI)</i>      | <i>HR* (95% CI)</i>          |
| CRP >3 mg/L & no plaque                        | 1.93 (1.32, 2.82)        | 2.36 (1.73, 3.22)            |
| TPA >median & CRP <1 mg/L                      | 1.85 (1.28, 2.68)        | 2.67 (1.97, 3.62)            |
| CRP >3 mg/L & TPA>median                       | 4.07 (2.93, 5.66)        | 4.17 (3.14, 5.54)            |
| <i>Measure</i>                                 | <i>Estimate (95% CI)</i> | <i>Estimate (95% CI)</i>     |
| Relative excess risk due to interaction (RERI) | 1.29 (0.32, 2.25)        | 0.13 (-0.82, 1.08)           |
| Attributable proportion (AP)                   | 0.32 (0.10, 0.53)        | 0.03 (-0.20, 0.26)           |
| Synergy index                                  | 1.72 (1.06, 2.81)        | 1.04 (0.77, 1.42)            |

HR, hazard ratio; CI, confidence interval. \*Age and sex adjusted.

**Table S8. Hazard ratios (HRs) with 95% confidence intervals (CIs) per standard deviation increase in C-reactive protein (CRP)\* across categories of total plaque area (TPA). Assessment of multiplicative interaction. The Tromsø Study.**

|                        | Ischemic stroke                    |                                    | Myocardial infarction              |                                    |
|------------------------|------------------------------------|------------------------------------|------------------------------------|------------------------------------|
|                        | HR <sup>†</sup><br>(95% CI)        | HR <sup>‡</sup><br>(95% CI)        | HR <sup>†</sup><br>(95% CI)        | HR <sup>‡</sup><br>(95% CI)        |
| Overall                | <b>1.32</b><br><b>(1.23, 1.41)</b> | <b>1.25</b><br><b>(1.16, 1.34)</b> | <b>1.25</b><br><b>(1.18, 1.32)</b> | <b>1.13</b><br><b>(1.06, 1.20)</b> |
| <i>TPA</i>             |                                    |                                    |                                    |                                    |
| No plaque              | <b>1.23</b><br><b>(1.08, 1.41)</b> | 1.15<br>(0.99, 1.33)               | <b>1.27</b><br><b>(1.15, 1.41)</b> | 1.11<br>(0.99, 1.25)               |
| TPA < median           | <b>1.27</b><br><b>(1.11, 1.56)</b> | <b>1.22</b><br><b>(1.05, 1.41)</b> | <b>1.23</b><br><b>(1.11, 1.37)</b> | <b>1.13</b><br><b>(1.01, 1.28)</b> |
| TPA > median           | <b>1.34</b><br><b>(1.22, 1.48)</b> | <b>1.29</b><br><b>(1.17, 1.43)</b> | <b>1.17</b><br><b>(1.08, 1.27)</b> | <b>1.11</b><br><b>(1.02, 1.21)</b> |
| Interaction<br>p-value | 0.65                               | 0.66                               | 0.44                               | 0.45                               |

\*Log-transformed.

† Adjusted for age and sex.

‡ Adjusted for age, sex, smoking, systolic blood pressure, total cholesterol, high-density lipoprotein cholesterol, diabetes mellitus, body mass index, lipid lowering medication and antihypertensive medication. Bold; p<0.05 for HR.

**Table S9. Crude incidence rates (IRs) and hazard ratios (HRs) with 95% confidence intervals (CIs) of first-ever ischemic stroke from time-fixed\* Cox models across risk categories of C-reactive protein (CRP). The Tromsø Study.**

| CRP                            | n ** | Events | Ischemic stroke             |                                     |                                     |
|--------------------------------|------|--------|-----------------------------|-------------------------------------|-------------------------------------|
|                                |      |        | IR <sup>†</sup><br>(95% CI) | Model 1 <sup>‡</sup><br>HR (95% CI) | Model 2 <sup>§</sup><br>HR (95% CI) |
| <b>Both sexes<sup>  </sup></b> |      |        |                             |                                     |                                     |
| < 1 mg /L                      | 4158 | 211    | 4.2 (3.7–4.8)               | Reference                           | Reference                           |
| 1–3 mg/L                       | 3898 | 258    | 5.9 (5.3–6.7)               | 1.25 (1.05–1.50)                    | 1.14 (0.95–1.37)                    |
| > 3 mg/L                       | 2053 | 202    | 9.6 (8.4–11.1)              | 2.05 (1.69–2.50)                    | 1.71 (1.40–2.09)                    |
| <b>Men</b>                     |      |        |                             |                                     |                                     |
| < 1 mg /L                      | 1738 | 103    | 4.9 (4.0–5.9)               | Reference                           | Reference                           |
| 1–3 mg/L                       | 1769 | 138    | 7.1 (6.0–8.4)               | 1.32 (1.03–1.71)                    | 1.21(0.93–1.57)                     |
| > 3 mg/L                       | 898  | 104    | 11.5 (9.5–14.0)             | 2.12 (1.61–2.78)                    | 1.76 (1.33–2.35)                    |
| <b>Women</b>                   |      |        |                             |                                     |                                     |
| < 1 mg /L                      | 2420 | 108    | 3.7 (3.1–4.5)               | Reference                           | Reference                           |
| 1–3 mg/L                       | 2129 | 120    | 5.0 (4.2–6.0)               | 1.18 (0.90–1.54)                    | 1.08 (0.82–1.41)                    |
| > 3 mg/L                       | 1155 | 98     | 8.2 (6.7–10.0)              | 2.00 (1.52–2.63)                    | 1.671.25–2.23)                      |

\*Values of exposure variables at time of study entrance. \*\*Participants. †Crude IRs per 1000 person-years. ‡ Adjusted for age (<sup>||</sup> and sex). §Adjusted for age, smoking, total cholesterol, high-density lipoprotein cholesterol, diabetes mellitus, systolic blood pressure, body mass index, lipid-lowering medication, antihypertensive medication (<sup>||</sup> and sex).

**Table 10. Crude incidence rates (IRs) and hazard ratios (HRs) with 95% confidence intervals (CIs) of first-ever myocardial infarction from time-fixed\* Cox models across risk categories of C-reactive protein (CRP). The Tromsø Study.**

| CRP                            | n ** | Events | Ischemic stroke             |                                     |                                     |
|--------------------------------|------|--------|-----------------------------|-------------------------------------|-------------------------------------|
|                                |      |        | IR <sup>†</sup><br>(95% CI) | Model 1 <sup>‡</sup><br>HR (95% CI) | Model 2 <sup>§</sup><br>HR (95% CI) |
| <b>Both sexes<sup>  </sup></b> |      |        |                             |                                     |                                     |
| < 1 mg /L                      | 4158 | 339    | 6.8 (6.2–7.6)               | Reference                           | Reference                           |
| 1–3 mg/L                       | 3898 | 452    | 10.6 (9.7–11.7)             | 1.38 (1.20–1.59)                    | 1.16 (1.00–1.34)                    |
| > 3 mg/L                       | 2053 | 288    | 13.9 (12.4–15.6)            | 1.78 (1.53–2.09)                    | 1.32 (1.12–1.56)                    |
| <b>Men</b>                     |      |        |                             |                                     |                                     |
| < 1 mg /L                      | 1738 | 194    | 9.4 (8.2–10.8)              | Reference                           | Reference                           |
| 1–3 mg/L                       | 1769 | 272    | 14.6 (12.9–16.4)            | 1.41 (1.18–1.70)                    | 1.22 (1.01–1.47)                    |
| > 3 mg/L                       | 898  | 167    | 18.9 (16.2–22.0)            | 1.80 (1.46–2.21)                    | 1.37 (1.11–1.70)                    |
| <b>Women</b>                   |      |        |                             |                                     |                                     |
| < 1 mg /L                      | 2420 | 145    | 5.0 (4.3–5.9)               | Reference                           | Reference                           |
| 1–3 mg/L                       | 2129 | 180    | 7.6 (6.5–8.8)               | 1.33 (1.07–1.65)                    | 1.08 (0.86–1.36)                    |
| > 3 mg/L                       | 1155 | 121    | 10.2 (8.5–12.2)             | 1.79 (1.40–2.28)                    | 1.28 (0.99–1.66)                    |

\*Values of exposure variables at time of study entrance. \*\*Participants. †Crude IRs per 1000 person-years. ‡ Adjusted for age (<sup>||</sup> and sex). §Adjusted for age, smoking, total cholesterol, high-density lipoprotein cholesterol, diabetes mellitus, systolic blood pressure, body mass index, lipid-lowering medication, antihypertensive medication (<sup>||</sup> and sex).

**Table S11. Crude incidence rates (IRs) and hazard ratios (HRs) with 95% confidence intervals (CIs) of first-ever ischemic stroke from time-fixed\* Cox models across categories of total plaque area (TPA), before and after adjustment for C-reactive protein (CRP). The Tromsø Study.**

| TPA                | n**  | Events | IR† (95% CI)     | Model 1‡ HR (95% CI) | Model 1‡ + CRP HR (95% CI) | Absolute attenuation of HR after inclusion of CRP in the model§ | Percentage attenuation of HR after inclusion of CRP in the model | Model 2   HR (95% CI) |
|--------------------|------|--------|------------------|----------------------|----------------------------|-----------------------------------------------------------------|------------------------------------------------------------------|-----------------------|
| <b>Both sexes#</b> |      |        |                  |                      |                            |                                                                 |                                                                  |                       |
| No plaque          | 5711 | 233    | 3.5 (3.1–4.0)    | Reference            | Reference                  | –                                                               | –                                                                | Reference             |
| TPA<median         | 2198 | 175    | 6.7 (5.8–7.8)    | 1.33 (1.09–1.62)     | 1.33 (1.09–1.62)           | 0                                                               | –                                                                | 1.28 (1.05–1.56)      |
| TPA>median         | 2200 | 263    | 11.5 (10.2–13.0) | 2.00 (1.67–2.42)     | 1.92 (1.60–2.31)           | 0.08                                                            | 8.0                                                              | 1.69 (1.39–2.04)      |
| <b>Men</b>         |      |        |                  |                      |                            |                                                                 |                                                                  |                       |
| No plaque          | 2284 | 114    | 4.3 (3.6–5.2)    | Reference            | Reference                  | –                                                               | –                                                                | Reference             |
| TPA<median         | 1060 | 96     | 6.9 (6.2–9.3)    | 1.27 (0.97–1.68)     | 1.27 (0.96–1.67)           | 0.00                                                            | –                                                                | 1.20 (0.91–1.59)      |
| TPA>median         | 1061 | 135    | 12.8 (10.8–15.1) | 1.91 (1.47–2.48)     | 1.79 (1.38–2.32)           | 0.12                                                            | 13.2                                                             | 1.57 (1.20–2.05)      |
| <b>Women</b>       |      |        |                  |                      |                            |                                                                 |                                                                  |                       |
| No plaque          | 3427 | 119    | 3.0 (2.5–3.6)    | Reference            | Reference                  | –                                                               | –                                                                | Reference             |
| TPA<median         | 1139 | 79     | 5.9 (4.7–7.3)    | 1.39 (1.04–1.85)     | 1.39 (1.05–1.86)           | 0.00                                                            | –                                                                | 1.37 (1.03–1.83)      |
| TPA>median         | 1138 | 128    | 10.4 (8.8–12.4)  | 2.10 (1.62–2.73)     | 2.05 (1.57–2.66)           | 0.05                                                            | 4.5                                                              | 1.83 (1.40–2.40)      |

\*Values of exposure variables at time of study entrance. \*\*Participants. †Crude IRs per 1000 person-years. ‡Adjusted for age (# and sex). §Absolute attenuation of HR after inclusion of CRP in the model (i.e. change in HR from Model 1 to Model 1 + CRP). CRP was log-transformed. || Adjusted for age, CRP (log-transformed), smoking, total cholesterol, high-density lipoprotein cholesterol, diabetes mellitus, systolic blood pressure, body mass index, lipid-lowering medication, antihypertensive medication (# and sex).

**Table S12. Crude incidence rates (IRs) and hazard ratios (HRs) with 95% confidence intervals (CIs) of first-ever myocardial infarction from time-fixed\* Cox models across categories of total plaque area (TPA), before and after adjustment for C-reactive protein (CRP). The Tromsø Study.**

| TPA                | n**  | Events | IR† (95% CI)     | Model 1‡ HR (95% CI) | Model 1‡ + CRP HR (95% CI) | Absolute attenuation of HR after inclusion of CRP in the model§ | Percentage attenuation of HR after inclusion of CRP in the model | Model 2   HR (95% CI) |
|--------------------|------|--------|------------------|----------------------|----------------------------|-----------------------------------------------------------------|------------------------------------------------------------------|-----------------------|
| <b>Both sexes#</b> |      |        |                  |                      |                            |                                                                 |                                                                  |                       |
| No plaque          | 5711 | 385    | 5.9 (5.4–6.6)    | Reference            | Reference                  | –                                                               | –                                                                | Reference             |
| TPA<median         | 2200 | 394    | 11.8 (10.5–13.2) | 1.45 (1.24–1.69)     | 1.44 (1.24–1.68)           | 0.01                                                            | 2.2                                                              | 1.31 (1.12–1.52)      |
| TPA>median         | 2198 | 300    | 17.6 (16.5–19.5) | 1.97 (1.70–2.29)     | 1.90 (1.64–2.20)           | 0.07                                                            | 7.2                                                              | 1.49 (1.28–1.73)      |
| <b>Men</b>         |      |        |                  |                      |                            |                                                                 |                                                                  |                       |
| No plaque          | 2284 | 229    | 9.0 (7.9–10.2)   | Reference            | Reference                  | –                                                               | –                                                                | Reference             |
| TPA<median         | 1061 | 172    | 14.0 (12.1–16.3) | 1.24 (1.01–1.51)     | 1.23 (1.00–1.50)           | 0.01                                                            | 4.2                                                              | 1.12(0.92–1.37)       |
| TPA>median         | 1060 | 232    | 22.6 (19.8–25.6) | 1.80 (1.49–2.18)     | 1.72 (1.41–2.08)           | 0.08                                                            | 10.0                                                             | 1.43 (1.17–1.74)      |
| <b>Women</b>       |      |        |                  |                      |                            |                                                                 |                                                                  |                       |
| No plaque          | 3427 | 156    | 4.0 (3.4–4.7)    | Reference            | Reference                  | –                                                               | –                                                                | Reference             |
| TPA<median         | 1139 | 128    | 14.0 (12.1–16.3) | 1.81(1.43–2.30)      | 1.81 (1.43–2.30)           | 0.00                                                            | –                                                                | 1.64 (1.29–2.08)      |
| TPA>median         | 1138 | 162    | 12.6 (10.8–14.6) | 2.22 (1.76–2.79)     | 2.17 (1.72–2.73)           | 0.05                                                            | 4.1                                                              | 1.63 (1.29–2.06)      |

\*Values of exposure variables at time of study entrance. \*\*Participants. †Crude IRs per 1000 person-years. ‡Adjusted for age (# and sex). §Absolute attenuation of HR after inclusion of CRP in the model (i.e. change in HR from Model 1 to Model 1 + CRP). CRP was log-transformed. || Adjusted for age, CRP (log-transformed), smoking, total cholesterol, high-density lipoprotein cholesterol, diabetes mellitus, systolic blood pressure, body mass index, lipid-lowering medication, antihypertensive medication (# and sex).

**Table S13. Incidence rates (IRs) and hazard ratios (HRs) with 95% confidence intervals (CIs) of first-ever ischemic stroke (IS) and myocardial infarction (MI) from time-fixed\* Cox models across constellations of C-reactive protein (CRP) and categories of total plaque area (TPA). The Tromsø Study.**

|                                 | Ischemic stroke |             |                             |                             | Myocardial infarction |             |                             |                             |
|---------------------------------|-----------------|-------------|-----------------------------|-----------------------------|-----------------------|-------------|-----------------------------|-----------------------------|
|                                 | n**             | Incident IS | IR <sup>†</sup><br>(95% CI) | HR <sup>‡</sup><br>(95% CI) | n**                   | Incident MI | IR <sup>†</sup><br>(95% CI) | HR <sup>‡</sup><br>(95% CI) |
| <b>Both sexes</b> <sup>  </sup> |                 |             |                             |                             |                       |             |                             |                             |
| No plaque & CRP <1 mg/L         | 2565            | 88          | 2.8 (2.3, 3.5)              | Ref.                        | 2565                  | 134         | 4.4 (3.7, 5.2)              | Ref.                        |
| No plaque & CRP 1-3mg/L         | 2149            | 84          | 3.5 (2.8, 4.3)              | 1.07 (0.79, 1.44)           | 2149                  | 159         | 6.7 (5.8, 7.9)              | 1.36 (1.08, 1.71)           |
| No plaque & CRP >3 mg/L         | 997             | 61          | 5.8 (4.5, 7.4)              | 1.90 (1.37, 2.64)           | 997                   | 92          | 8.8 (7.2, 10.8)             | 1.89 (1.45, 2.47)           |
| TPA<median & CRP <1 mg/L        | 912             | 55          | 4.7 (3.6, 6.2)              | 1.11 (0.79, 1.56)           | 912                   | 106         | 9.4 (7.8, 11.3)             | 1.52 (1.17, 1.96)           |
| TPA<median & CRP 1-3 mg/L       | 825             | 73          | 7.7 (6.1, 9.6)              | 1.78 (1.30, 2.44)           | 825                   | 117         | 12.4 (10.4, 14.9)           | 1.96 (1.53, 2.52)           |
| TPA<median & CRP >3 mg/L        | 461             | 47          | 9.6 (7.2, 12.8)             | 2.20 (1.54, 3.15)           | 461                   | 77          | 16.1 (12.9, 20.1)           | 2.52 (1.89, 3.34)           |
| TPA>median & CRP <1 mg/L        | 681             | 68          | 9.1 (6.3, 10.1)             | 1.87 (1.35, 2.58)           | 681                   | 99          | 13.5 (11.1, 16.4)           | 2.00 (1.54, 2.61)           |
| TPA>median & CRP 1-3 mg/L       | 924             | 101         | 10.3 (8.4, 12.5)            | 2.10 (1.57, 2.82)           | 924                   | 176         | 18.6 (16.0, 21.5)           | 2.69 (2.14, 3.39)           |
| TPA>median & CRP >3 mg/L        | 594             | 94          | 17.2 (14.0, 21.0)           | 3.58 (2.66, 4.83)           | 595                   | 119         | 21.6 (18.0, 25.8)           | 3.06 (2.37, 3.94)           |
| <b>Men</b>                      |                 |             |                             |                             |                       |             |                             |                             |
| No plaque & CRP <1 mg/L         | 990             | 41          | 3.4 (2.5, 4.6)              | Ref.                        | 990                   | 77          | 6.4 (5.2, 8.1)              | Ref.                        |
| No plaque & CRP 1-3mg/L         | 912             | 44          | 4.4 (3.3, 5.9)              | 1.12(0.73, 1.72)            | 912                   | 97          | 10.0 (8.2, 12.2)            | 1.29 (1.01, 1.88)           |
| No plaque & CRP >3 mg/L         | 382             | 29          | 7.1 (4.9, 10.2)             | 1.96 (1.22, 3.17)           | 383                   | 55          | 14.1 (10.8, 18.4)           | 2.05 (1.45, 2.90)           |
| TPA<median & CRP <1 mg/L        | 437             | 28          | 4.8 (3.3, 5.9)              | 0.98 (0.60, 1.59)           | 437                   | 60          | 10.8 (8.4, 13.9)            | 1.28 (0.91, 1.80)           |
| TPA<median & CRP 1-3 mg/L       | 408             | 44          | 9.6 (7.2, 12.9)             | 1.95 (1.27, 3.00)           | 408                   | 72          | 16.0 (12.7, 20.2)           | 1.85 (1.34, 2.56)           |
| TPA<median & CRP >3 mg/L        | 215             | 24          | 10.6 (7.1, 15.8)            | 2.11 (1.27, 3.51)           | 215                   | 40          | 18.1 (13.3, 24.7)           | 2.09 (1.42, 3.07)           |
| TPA>median & CRP <1 mg/L        | 311             | 34          | 10.7 (7.6, 15.0)            | 1.92 (1.21, 3.51)           | 311                   | 57          | 18.3 (14.1, 23.8)           | 1.95 (1.38, 2.77)           |
| TPA>median & CRP 1-3 mg/L       | 449             | 50          | 10.6 (8.1, 14.0)            | 1.94 (1.28, 2.96)           | 449                   | 103         | 23.2 19.1, 28.1)            | 2.49 (1.84, 3.38)           |
| TPA>median & CRP >3 mg/L        | 301             | 51          | 19.0 (14.4, 25.0)           | 3.43 (2.24, 5.23)           | 301                   | 72          | 26.3 (20.9, 33.1)           | 2.76 (1.98, 3.84)           |
| <b>Women</b>                    |                 |             |                             |                             |                       |             |                             |                             |
| No plaque & CRP <1 mg/L         | 1575            | 47          | 2.5 (1.8, 3.3)              | Ref.                        | 1575                  | 57          | 3.0 (2.4, 3.6)              | Ref.                        |
| No plaque & CRP 1-3mg/L         | 1237            | 40          | 2.9 (2.1, 3.9)              | 1.02 (0.67, 1.55)           | 1237                  | 62          | 4.5 (3.5, 5.7)              | 1.31 (0.91, 1.87)           |
| No plaque & CRP >3 mg/L         | 615             | 32          | 4.9 (3.5, 6.9)              | 1.86 (1.19, 2.92)           | 615                   | 37          | 5.7 (4.1, 7.8)              | 1.72 (1.14, 2.60)           |
| TPA<median & CRP <1 mg/L        | 475             | 27          | 4.6 (3.2, 6.7)              | 1.30 (0.81, 2.09)           | 475                   | 46          | 8.0 (6.0, 10.7)             | 1.94 (1.31, 2.86)           |
| TPA<median & CRP 1-3 mg/L       | 417             | 29          | 5.8 (4.1, 8.4)              | 1.57 (0.98, 2.50)           | 417                   | 45          | 9.2 (6.9, 12.3)             | 2.11 (1.42, 3.12)           |
| TPA<median & CRP >3 mg/L        | 246             | 23          | 8.8 (5.8, 13-1)             | 2.30 (1.39, 3.81)           | 245                   | 37          | 14.3 (10.4, 19.8)           | 3.17 (2.09, 4.82)           |
| TPA>median & CRP <1 mg/L        | 370             | 34          | 7.8 (5.6, 11.0)             | 1.81 (1.16, 2.84)           | 370                   | 42          | 9.9 (7.3, 13.4)             | 2.05 (1.37, 3.07)           |
| TPA>median & CRP 1-3 mg/L       | 475             | 51          | 9.9 (7.5, 13.1)             | 2.27 (1.52, 3.41)           | 475                   | 73          | 14.5 (11.5, 18.2)           | 2.94 (2.06, 4.19)           |
| TPA>median & CRP >3 mg/L        | 294             | 43          | 15.4 (11.4, 20.8)           | 3.78 (2.45, 5.77)           | 294                   | 47          | 16.9 (12.7, 22.5)           | 3.58 (2.41, 5.30)           |

\*Values of exposure variables at time of study entrance. \*\*Participants. † Crude incidence rates per 1000 person-years.‡ Adjusted for age (|| and sex).



**Table S14. Performance of time-fixed\* Cox regression models for ischemic stroke (IS) with addition of total plaque area (TPA), C-reactive protein (CRP) and both (TPA+CRP) compared to Framingham risk factor based model. The Tromsø Study.**

| Performance measure                                                                | Framingham risk factor model | +TPA <sup>†</sup>          | +CRP <sup>†</sup>          | +Both <sup>†</sup>         | +TPA <sup>‡</sup>          | +CRP <sup>‡</sup>          | +Both <sup>‡</sup>         |
|------------------------------------------------------------------------------------|------------------------------|----------------------------|----------------------------|----------------------------|----------------------------|----------------------------|----------------------------|
| <b>Harrells C-index</b><br>(95% CI)                                                | 0.7523<br>(0.7358, 0.7613)   | 0.7594<br>(0.7355, 0.7736) | 0.7552<br>(0.7348, 0.7722) | 0.7613<br>(0.7350, 0.7730) | 0.7586<br>(0.7338, 0.7663) | 0.7574<br>(0.7339, 0.7687) | 0.7630<br>(0.7342, 0.7714) |
|                                                                                    | <i>p</i> -value              | <b>0.040</b>               | 0.394                      | <b>0.010</b>               | <b>0.045</b>               | 0.104                      | <b>0.002</b>               |
| <b>NRI</b>                                                                         |                              |                            |                            |                            |                            |                            |                            |
| <i>Estimated incident IS at 10 years follow-up (n=490) <sup>§</sup></i>            |                              |                            |                            |                            |                            |                            |                            |
| % cases moved up <sup>  </sup>                                                     |                              | 12.3                       | 10.8                       | 19.3                       | 11.7                       | 13.5                       | 17.8                       |
| % cases moved down <sup>  </sup>                                                   |                              | 10.0                       | 8.1                        | 12.6                       | 9.5                        | 5.4                        | 13.2                       |
| NRI for IS cases, % (95% CI)                                                       |                              | 2.3 (-2.5, 7.1)            | 2.8 (-1.9, 7.)             | 6.6 (1.9, 11.3)            | 2.2 (-1.7, 6.1)            | 3.8 (-0.5, 8.0)            | 4.6 (0.3, 8.9)             |
|                                                                                    | <i>p</i> -value              | 0.226                      | 0.214                      | <b>0.005</b>               | 0.280                      | 0.069                      | <b>0.036</b>               |
| <i>Estimated non-events (controls) at 10 years follow-up (n=9619) <sup>§</sup></i> |                              |                            |                            |                            |                            |                            |                            |
| % non-events moved up <sup>  </sup>                                                |                              | 5.6                        | 4.5                        | 7.1                        | 6.5                        | 5.7                        | 7.7                        |
| % non-events moved down <sup>  </sup>                                              |                              | 6.4                        | 3.9                        | 7.1                        | 6.3                        | 5.4                        | 7.6                        |
| NRI for controls, % (95% CI)                                                       |                              | 0.6 (-0.8, 2.0)            | -0.5 (1.9, 1.4)            | -0.03 (-1.5, 1.2)          | -0.2 (-0.1, 1.6)           | -0.03 (-1.8, 1.2)          | -0.1 (-1.5, 1.3)           |
|                                                                                    | <i>p</i> -value              | 0.369                      | 0.400                      | 0.956                      | 0.773                      | 0.675                      | 0.849                      |
| <b>Overall categorical NRI<sup>  </sup>, % (95% CI)</b>                            |                              | 2.8 (-2.0, 7.6)            | 2.2 (-2.7, 6.9)            | 6.6 (1.8, 11.4)            | 2.1 (-2.1, 6.3)            | 3.6 (-0.8, 8.0)            | 4.5 (-0.1, 9.1)            |
|                                                                                    | <i>p</i> -value              | 0.226                      | 0.338                      | <b>0.007</b>               | 0.35                       | 0.110                      | 0.051                      |
| <b>Continuous NRI, % (95% CI)</b>                                                  |                              | 19.8 (5.5, 34.1)           | 20.1 (5.0, 35.2)           | 22.2 (8.7, 35.7)           | 22.8 (11.2, 34.4)          | 19.5 (8.6, 31.3)           | 31.1 (16.6, 45.8)          |
|                                                                                    | <i>p</i> -value              | <b>0.002</b>               | <b>0.002</b>               | <b>&lt;0.001</b>           | <b>&lt;0.001</b>           | <b>&lt;0.001</b>           | <b>&lt;0.001</b>           |
| <b>Relative IDI, % (95% CI)</b>                                                    |                              | 0.16 (0.03, 0.29)          | 0.09 (-0.03, 0.21)         | 0.24 (0.09, 0.38)          | 0.09 (0.02, 0.17)          | 0.13 (0.06, 0.20)          | 0.22 (0.09, 0.35)          |
|                                                                                    | <i>p</i> -value              | <b>0.0023</b>              | 0.075                      | <b>&lt;0.001</b>           | <b>0.03</b>                | <b>&lt;0.001</b>           | <b>&lt;0.001</b>           |
| <b>HL-X<sup>2</sup></b>                                                            | 9.96                         | 10.33                      | 10.63                      | 8.67                       | 8.25                       | 8.21                       | 11.8                       |
|                                                                                    | <i>p</i> -value              | 0.268                      | 0.240                      | 0.220                      | 0.498                      | 0.413                      | 0.159                      |

NRI, net reclassification improvement; IDI, integrated discrimination improvement; HL-X<sup>2</sup> Hosmer-Lemeshow chi<sup>2</sup> test; CI, confidence interval. Framingham risk factor model includes sex, age, systolic blood pressure, high-density lipoprotein cholesterol, total cholesterol, smoking and antihypertensive medication. \*Values of exposure variables at time of study entrance. <sup>†</sup> Included as continuous variables TPA (square root transformed), CRP (log transformed). <sup>‡</sup> Included as categorical variables; TPA (no plaque, < median and > median, with no plaque as reference category); CRP (<1 mg/L, 1-3 mg/L and >3 mg/L, with CRP <1 mg/L as reference category). <sup>§</sup> All observed risks have been interpolated to 10-year event rates by Kaplan Meier risk estimates using the actual observed events over a median follow up of 11 years. <sup>||</sup> Considering risk-categories; <5%, 5-10%, 10-20% and >20%. *p*-values are for comparison with Framingham risk factor model. Bold; *p*<0.05.

**Table S15. Performance of time-fixed\* Cox regression models for myocardial infarction (MI) with addition total plaque area (TPA), C-reactive protein (CRP) and both (TPA+CRP) compared to Framingham risk factor-based model. The Tromsø Study.**

| Performance measure                                                               | Framingham risk factor model | +TPA <sup>†</sup> | +CRP <sup>†</sup>  | +Both <sup>†</sup> | +TPA <sup>‡</sup> | +CRP <sup>‡</sup>  | +Both <sup>‡</sup> |
|-----------------------------------------------------------------------------------|------------------------------|-------------------|--------------------|--------------------|-------------------|--------------------|--------------------|
| <b>Harrells C-index</b>                                                           | 0.7435                       | 0.7501            | 0.7452             | 0.7514             | 0.7499            | 0.7458             | 0.7519             |
| (95% CI)                                                                          | (0.7251, 0.7606)             | (0.7321, 0.7655)  | (0.7318, 0.7648)   | (0.7369, 0.7672)   | (0.7318, 0.7648)  | (0.7317, 0.7644)   | (0.7344, 0.7643)   |
| <i>p</i> -value                                                                   |                              | <b>0.013</b>      | 0.535              | <b>&lt;0.001</b>   | <b>0.016</b>      | 0.386              | <b>0.003</b>       |
| <b>NRI</b>                                                                        |                              |                   |                    |                    |                   |                    |                    |
| <i>Estimated incident MI at 10 years follow-up (n=895)<sup>§</sup></i>            |                              |                   |                    |                    |                   |                    |                    |
| % cases moved up <sup>  </sup>                                                    |                              | 11.4              | 8.0                | 11.9               | 12.1              | 9.2                | 13.4               |
| % cases moved down <sup>  </sup>                                                  |                              | 8.8               | 4.3                | 9.3                | 8.9               | 5.5                | 9.1                |
| NRI for MI cases, % (95% CI)                                                      |                              | 2.5 (-0.5, 5.5)   | 3.7 (0.3-7.1)      | 2.6 (-1.0, 6.2)    | 3.2 (-0.01, 6.6)  | 3.7 (0.1, 7.3)     | 4.3 (0.5, 8.0)     |
| <i>p</i> -value                                                                   |                              | 0.052             | <b>0.038</b>       | 0.16               | 0.06              | <b>0.049</b>       | <b>0.025</b>       |
| <i>Estimated non-events (controls) at 10 years follow-up (n=9214)<sup>§</sup></i> |                              |                   |                    |                    |                   |                    |                    |
| % non-events moved up <sup>  </sup>                                               |                              | 6.2               | 3.3                | 6.6                | 7.0               | 4.6                | 7.8                |
| % non-events moved down <sup>  </sup>                                             |                              | 7.4               | 3.3                | 7.6                | 8.0               | 4.6                | 8.5                |
| NRI for controls, % (95% CI)                                                      |                              | 1.2 (0.2, 2.2)    | 0.02 (-1.3, 1.7)   | 1.0 (-0.3, 2.3)    | 1.0 (0.2, 1.8)    | -0.02 (-0.5, 0.5)  | 0.7 (-0.6, 1.7)    |
| <i>p</i> -value                                                                   |                              | <b>0.049</b>      | 0.973              | 0.10               | <b>0.015</b>      | 0.974              | 0.240              |
| <b>Overall categorical NRI<sup>  </sup>, % (95% CI)</b>                           |                              | 3.8 (0.6, 7.0)    | 3.7 (-0.1, 7.5)    | 3.6 (-0.01, 7.3)   | 4.2 (0.5, 7.3)    | 3.7 (-0.01, 7.1)   | 5.0 (1.2, 8.7)     |
| <i>p</i> -value                                                                   |                              | <b>0.03</b>       | 0.051              | 0.062              | <b>0.029</b>      | 0.055              | <b>0.011</b>       |
| <b>Continuous NRI, % (95% CI)</b>                                                 |                              | 19.4 (12.6, 27.0) | 22.0 (13.6, 30.4)  | 13.8 (3.3, 24.3)   | 26.7 (19.5, 33.9) | 13.0 (-0.02, 28.2) | 20.6 (9.7, 31.5)   |
| <i>p</i> -value                                                                   |                              | <b>&lt;0.001</b>  | <b>&lt;0.001</b>   | <b>0.007</b>       | <b>&lt;0.001</b>  | 0.098              | <b>&lt;0.001</b>   |
| <b>Relative IDI, % (95% CI)</b>                                                   |                              | 0.07 (0.05, 0.10) | 0.03 (-0.01, 0.07) | 0.09 (0.04, 0.15)  | 0.04 (0.02, 0.06) | 0.04 (0.02, 0.05)  | 0.07 (0.02, 0.11)  |
| <i>p</i> -value                                                                   |                              | <b>&lt;0.001</b>  | 0.174              | <b>0.002</b>       | <b>0.030</b>      | <b>0.041</b>       | <b>0.012</b>       |
| <b>HL-X<sup>2</sup></b>                                                           | 40.7                         | 29.4              | 44.6               | 29.0               | 29.9              | 40.65              | 29.6               |
| <i>p</i> -value                                                                   | <b>&lt;0.0001</b>            | <b>&lt;0.0001</b> | <b>&lt;0.0001</b>  | <b>0.0003</b>      | <b>&lt;0.0001</b> | <b>&lt;0.0001</b>  | <b>&lt;0.0001</b>  |

NRI, net reclassification improvement; IDI, integrated discrimination improvement; HL-X<sup>2</sup> Hosmer-Lemeshow chi<sup>2</sup> test; CI, confidence interval. Framingham risk factor model includes sex, age, systolic blood pressure, high-density lipoprotein cholesterol, total cholesterol, smoking and antihypertensive medication. \*Values of variables at time of study entrance. † Included as continuous variables TPA (square root transformed), CRP (log transformed). ‡ Included as categorical variables; TPA (no plaque, < median and > median, with no plaque as reference category); CRP (<1 mg/L, 1-3 mg/L and >3 mg /L, with CRP <1 mg/L as reference category). § All observed risks have been interpolated to 10-year event rates by Kaplan Meier risk estimates using the actual observed events over a median follow up of 11 years. || Considering risk-categories; <5%, 5-10%, 10-20% and >20%. *p*-values are for comparison with Framingham risk factor model. Bold; *p*<0.05.

**Table S16. Performance of time-fixed\* Cox regression models for ischemic stroke (IS) in subjects at intermediate risk (5-20%, n=2994) with addition of total plaque area (TPA), C-reactive protein (CRP) and both (TPA+CRP) compared to Framingham risk factor-based model. The Tromsø Study.**

| Performance measure                                                               | +TPA <sup>†</sup> | +CRP <sup>†</sup> | +Both <sup>†</sup> | +TPA <sup>‡</sup> | +CRP <sup>‡</sup> | +Both <sup>‡</sup> |
|-----------------------------------------------------------------------------------|-------------------|-------------------|--------------------|-------------------|-------------------|--------------------|
| <b>NRI</b>                                                                        |                   |                   |                    |                   |                   |                    |
| <i>Estimated incident IS at 10 years follow-up (n=299)<sup>§</sup></i>            |                   |                   |                    |                   |                   |                    |
| % cases moved up <sup>  </sup>                                                    | 14.7              | 13.3              | 24.4               | 15.2              | 16.6              | 22.1               |
| % cases moved down <sup>  </sup>                                                  | 13.5              | 9.9               | 16.5               | 12.9              | 12.8              | 18.3               |
| NRI for IS cases, % (95% CI)                                                      | 1.2 (-6.0, 8.4)   | 3.5 (-3.6, 10.6)  | 7.8 (-0.4, 16.0)   | 2.2 (-4.5, 8.9)   | 3.8 (-3.3, 10.9)  | 3.8 (-3.3, 10.9)   |
| <i>p</i> -value                                                                   | 0.74              | 0.33              | 0.06               | 0.52              | 0.29              | 0.29               |
| <i>Estimated non-events (controls) at 10 years follow-up (n=2695)<sup>§</sup></i> |                   |                   |                    |                   |                   |                    |
| % non-events moved up <sup>  </sup>                                               | 8.8               | 6.4               | 10.4               | 9.5               | 9.1               | 11.3               |
| % non-events moved down <sup>  </sup>                                             | 21.9              | 13.1              | 24.2               | 21.6              | 17.9              | 25.8               |
| NRI for controls, % (95% CI)                                                      | 13.3 (9.0, 17.6)  | 6.7 (1.0, 12.4)   | 13.8 (8.1, 19.5)   | 12.1 (9.9, 14.3)  | 8.8 (5.1, 12.5)   | 14.5 (10.2, 18.8)  |
| <i>p</i> -value                                                                   | <b>&lt;0.001</b>  | <b>0.02</b>       | <b>&lt;0.001</b>   | <b>&lt;0.001</b>  | <b>&lt;0.001</b>  | <b>&lt;0.001</b>   |
| <b>Overall categorical NRI<sup>  </sup>, % (95% CI)</b>                           | 14.4 (6.6, 22.2)  | 10.1 (2.3, 17.9)  | 21.6 (11.0, 32.2)  | 14.3 (7.1, 21.4)  | 12.6 (5.2, 20.1)  | 18.3 (10.3, 26.3)  |
| <i>p</i> -value                                                                   | <b>&lt;0.001</b>  | <b>0.016</b>      | <b>&lt;0.001</b>   | <b>&lt;0.001</b>  | <b>0.001</b>      | <b>&lt;0.001</b>   |
| <b>Continuous NRI, % (95% CI)</b>                                                 | 21.0 (6.7, 35.3)  | 24.7 (10.4, 39.0) | 30.8 (15.3, 46.3)  | 24.8 (11.1, 38.5) | 20.8 (6.9, 34.7)  | 30.5 (16.0, 45.0)  |
| <i>p</i> -value                                                                   | <b>0.004</b>      | <b>&lt;0.001</b>  | <b>&lt;0.001</b>   | <b>&lt;0.001</b>  | <b>0.004</b>      | <b>&lt;0.001</b>   |
| <b>Relative IDI, % (95% CI)</b>                                                   | 0.46 (0.23, 0.69) | 0.32 (0.09, 0.56) | 0.78 (0.43, 1.13)  | 0.38 (0.33, 0.43) | 0.48 (0.36, 0.60) | 0.86 (0.59, 1.13)  |
| <i>p</i> -value                                                                   | <b>&lt;0.001</b>  | <b>0.007</b>      | <b>&lt;0.001</b>   | <b>0.01</b>       | <b>&lt;0.001</b>  | <b>&lt;0.001</b>   |

NRI, net reclassification improvement; IDI, integrated discrimination improvement; CI, confidence interval. Framingham risk factor model includes sex, age, systolic blood pressure, high-density lipoprotein cholesterol, total cholesterol, smoking and antihypertensive medication. \*Values of variables at time of study entrance. <sup>†</sup> Included as continuous variables, TPA (square root transformed), CRP (log transformed). <sup>‡</sup> Included as categorical variables; TPA (no plaque, < median and > median, with no plaque as reference category); CRP (<1 mg/L, 1-3 mg/L and >3 mg/L, with CRP <1 mg/L as reference category). <sup>§</sup> All observed risks have been interpolated to 10-year event rates by Kaplan Meier risk estimates using the actual observed events over a median follow up of 11 years. <sup>||</sup> Considering risk-categories; <5%, 5-10%, 10-20% and >20%. *p*-values are for comparison with Framingham risk factor model. Bold; *p*<0.05.

**Table S17. Performance of time-fixed\* Cox regression models for myocardial infarction (MI) in subjects at intermediate risk (5-20%, n=5250) with addition of total plaque area (TPA), C-reactive protein (CRP) and both (TPA+CRP) compared to Framingham risk factor-based model. The Tromsø Study.**

| Performance measure                                                                | +TPA <sup>†</sup>  | +CRP <sup>†</sup>  | +Both <sup>†</sup> | +TPA <sup>‡</sup>  | +CRP <sup>‡</sup>  | +Both <sup>‡</sup> |
|------------------------------------------------------------------------------------|--------------------|--------------------|--------------------|--------------------|--------------------|--------------------|
| <b>NRI</b>                                                                         |                    |                    |                    |                    |                    |                    |
| <i>Estimated incident MI at 10 years follow-up (n=562) <sup>§</sup></i>            |                    |                    |                    |                    |                    |                    |
| % cases moved up <sup>  </sup>                                                     | 15.4               | 10.3               | 15.0               | 16.4               | 11.5               | 17.3               |
| % cases moved down <sup>  </sup>                                                   | 9.6                | 4.6                | 10.5               | 10.5               | 6.7                | 10.6               |
| NRI for MI cases, % (95% CI)                                                       | 5.7 (-1.6, 13.0)   | 5.7 (-1.4, 12.8)   | 4.5 (-2.4, 11.4)   | 5.9 (-1.9, 13.7)   | 4.8 (-2.6, 12.2)   | 6.7 (-0.7, 14.1)   |
| <i>p</i> -value                                                                    | 0.12               | 0.11               | 0.20               | 0.14               | 0.21               | <b>0.08</b>        |
| <i>Estimated non-events (controls) at 10 years follow-up (n=4688) <sup>§</sup></i> |                    |                    |                    |                    |                    |                    |
| % non-events moved up <sup>  </sup>                                                | 7.7                | 3.4                | 8.0                | 8.3                | 4.8                | 9.4                |
| % non-events moved down <sup>  </sup>                                              | 12.5               | 5.9                | 12.9               | 13.9               | 8.1                | 14.6               |
| NRI for controls, % (95% CI)                                                       | 4.8 (-2.8, 12.4)   | 2.5 (-5.5, 10.5)   | 4.8 (-3.0, 11.8)   | 5.6 (-0.8, 12.0)   | 3.3(-4.3, 10.9)    | 5.3 (2.3, 12.9)    |
| <i>p</i> -value                                                                    | 0.22               | 0.55               | 0.23               | 0.06               | 0.40               | 0.18               |
| <b>Overall categorical NRI<sup>  </sup>, % (95% CI)</b>                            | 10.5 (1.3, 19.7)   | 8.2 (-1.6, 18.0)   | 9.3 (-0.3, 18.9)   | 11.6 (1.4, 21.8)   | 8.1 (-2.3, 18.5)   | 12.0 (2.0, 22.0)   |
| <i>p</i> -value                                                                    | <b>0.04</b>        | 0.10               | 0.06               | <b>0.03</b>        | 0.13               | <b>0.02</b>        |
| <b>Continuous NRI, % (95% CI)</b>                                                  | 18.2 (0.4, 20.3)   | 18.2 (1.0, 35.4)   | 14.9 (-2.2, 32.0)  | 15.1 (-1.2, 31.4)  | 7.1 (-11.9, 26.1)  | 17.0 (-1.4, 35.4)  |
| <i>p</i> -value                                                                    | <b>0.05</b>        | <b>0.04</b>        | 0.09               | 0.07               | 0.463              | 0.07               |
| <b>Relative IDI, % (95% CI)</b>                                                    | 0.24 (-0.15, 0.64) | 0.06 (-0.35, 0.47) | 0.28 (-0.11, 0.67) | 0.22 (-0.15, 0.59) | 0.09 (-0.34, 0.52) | 0.30 (-0.11, 0.71) |
| <i>p</i> -value                                                                    | 0.24               | 0.78               | 0.18               | 0.25               | 0.67               | 0.14               |

NRI, net reclassification improvement; IDI, integrated discrimination improvement; CI, confidence interval. Framingham risk factor model includes sex, age, systolic blood pressure, high-density lipoprotein cholesterol, total cholesterol, smoking and antihypertensive medication. \*Values of variables at time of study entrance. <sup>†</sup> Included as continuous variables, TPA (square root transformed), CRP (log transformed). <sup>‡</sup> Included as categorical variables; TPA (no plaque, < median and > median, with no plaque as reference category); CRP (<1 mg/L, 1-3 mg/L and >3 mg/L, with CRP <1 mg/L as reference category). <sup>§</sup> All observed risks have been interpolated to 10-year event rates by Kaplan Meier risk estimates using the actual observed events over a median follow up of 11 years. <sup>||</sup> Considering risk-categories; <5%, 5-10%, 10-20% and >20%. *p*-values are for comparison with Framingham risk factor model. Bold; *p*<0.05.
